# Supplementary material for: A Comprehensive Analysis of FUT8 Overexpressing Prostate Cancer Cells Reveals the Role of EGFR in Castration Resistance
Source: MDPI journal article supplement (doi:10.3390/cancers12020468), 2020-02-18
Supplement: s1 [file s1]

# Supplementary Materials: A Comprehensive Analysis of FUT8 Overexpressing Prostate Cancer Cells Reveals the Role of EGFR in Castration Resistance

**Supplemental Figure 1**

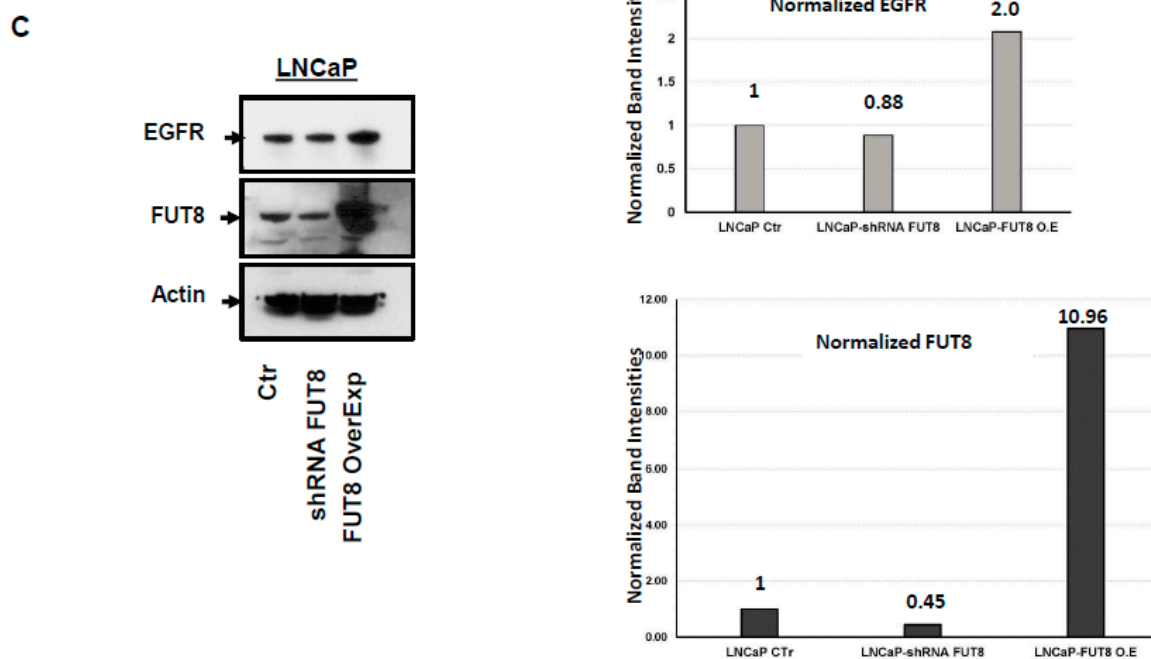

**Figure S1.** Western blot analysis for phosphorylated EGFR protein in LNCaP Ctr and LNCaP-FUT8 cells that were either mock treated (DMSO) or treated with EGF (2ng/ml). Actin is included to serve as equal amount of loading across the lanes (A). Differential expression of several phospho-peptides identified across cell lines when compare to the wildtype LNCaP-Ctr cells (B). Western blot analysis for the LNCaP Ctr and LNCaP-shRNA Fut8 cells showing downregulation of EGFR (C).

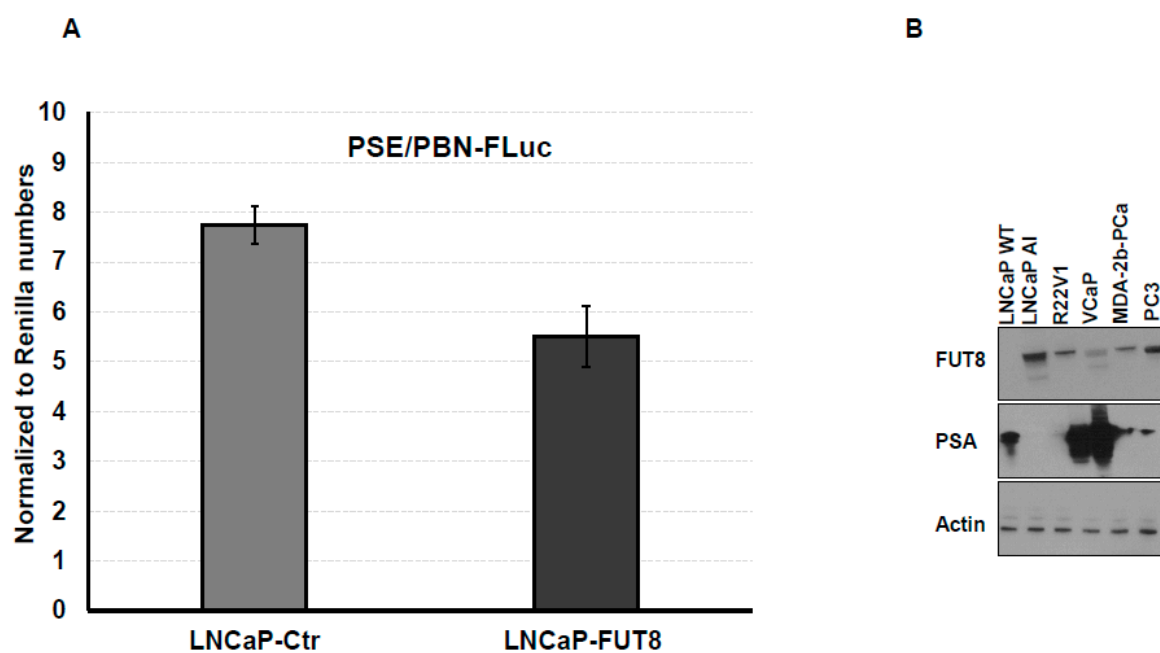

**Figure S2.** AR reporter assay showing the activity of PSE/PBN promoter in LNCaP Ctr and LNCaP-FUT8 cells (A) Western blot analysis for FUT8 and PSA in several different prostate cancer cell lines (B).

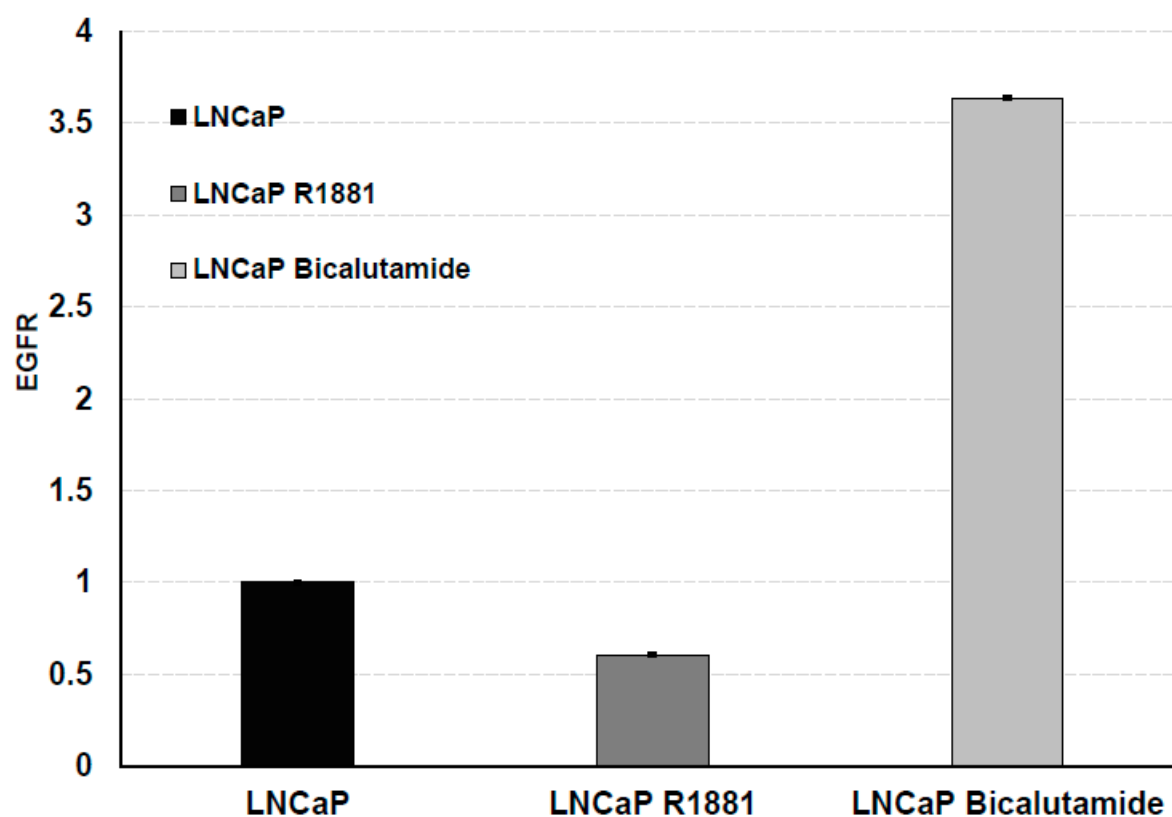

**Figure S3.** QRT PCR analysis showing relative expression of EGFR mRNA in cells that were treated with R1881 or with anti-androgen (Bicalutamide).

# A Intensity ratio of each band Normalized to Actin Intensity

|      | LNCaP WT | LNCaP-FUT8 |
|------|----------|------------|
| FUT8 | 0.446    | 0.863      |
| EGFR | 0.517    | 0.665      |
| AR   | 0.757    | 0.801      |
| PSA  | 1.116    | 0.847      |

**Figure S4.** Quantitation of western blot using ImageJ in LNCaP WT and LNCaP-FUT8 for figure 3A and B.

**Supplemental Table 3a**

| Index                                  | Label                              | log2(LNCaP-FUT8) | log2(PC3)    | log2(LNCaP-95) | RowLabel | High_Man | Static | Fuc | Others | GlyLabel |
|----------------------------------------|------------------------------------|------------------|--------------|----------------|----------|----------|--------|-----|--------|----------|
| DSISINATNIK_N2H10                      | N352_HexNAc(2)Hex(10)              | 2.281536508      | 1.745930216  | 1.544194624    | EGFR     | 1        | 0      | 0   | 0      | High_Man |
| DSISINATNIK_N2H4                       | N352_HexNAc(2)Hex(4)               | 0.157335282      | 0.863108056  | 1.191806893    | EGFR     | 1        | 0      | 0   | 0      | High_Man |
| DSISINATNIK_N2H5                       | N352_HexNAc(2)Hex(5)               | 0.396228836      | 0.397908839  | 0.534980489    | EGFR     | 1        | 0      | 0   | 0      | High_Man |
| DSISINATNIK_N2H5F1                     | N352_HexNAc(2)Hex(5)Fuc(1)         | 0.347006872      | 0.106117502  | 0.190493903    | EGFR     | 0        | 0      | 1   | 0      | Fucose   |
| DSISINATNIK_N2H6                       | N352_HexNAc(2)Hex(6)               | 0.661104339      | 0.634133998  | 0.256901508    | EGFR     | 1        | 0      | 0   | 0      | High_Man |
| DSISINATNIK_N2H6F1                     | N352_HexNAc(2)Hex(6)Fuc(1)         | 2.033087438      | 2.271206919  | 0.266873208    | EGFR     | 0        | 0      | 1   | 0      | Fucose   |
| DSISINATNIK_N2H7                       | N352_HexNAc(2)Hex(7)               | 2.377751257      | 2.845200045  | 0.587646452    | EGFR     | 1        | 0      | 0   | 0      | High_Man |
| DSISINATNIK_N2H7F1                     | N352_HexNAc(2)Hex(7)Fuc(1)         | 1.954272233      | 2.097150725  | 0.257012574    | EGFR     | 0        | 0      | 1   | 0      | Fucose   |
| DSISINATNIK_N2H8                       | N352_HexNAc(2)Hex(8)               | 1.968219964      | 1.882512616  | 0.043141685    | EGFR     | 1        | 0      | 0   | 0      | High_Man |
| DSISINATNIK_N2H9                       | N352_HexNAc(2)Hex(9)               | 1.77972981       | 1.611446823  | 0.981005875    | EGFR     | 1        | 0      | 0   | 0      | High_Man |
| DSISINATNIK_N4H4S1                     | N352_HexNAc(4)Hex(4)NeuAc(1)       | 1.174165198      | 1.277168108  | -0.286061636   | EGFR     | 0        | 1      | 0   | 0      | Static   |
| DSISINATNIK_N4H4F1                     | N352_HexNAc(4)Hex(4)Fuc(1)         | 0.520727072      | 0.572157631  | 0.54298122     | EGFR     | 0        | 0      | 1   | 0      | Fucose   |
| DSISINATNIK_N4H4F2                     | N352_HexNAc(4)Hex(4)Fuc(2)         | 1.483874327      | 1.72051809   | 0.174441385    | EGFR     | 0        | 0      | 1   | 0      | Fucose   |
| DSISINATNIK_N6H4                       | N352_HexNAc(6)Hex(4)               | 1.591847009      | 1.636491822  | 0.909359565    | EGFR     | 0        | 0      | 0   | 1      | Others   |
| DSISINATNIK_N6H5                       | N352_HexNAc(6)Hex(5)               | 1.562503669      | 1.021037045  | 0.953288895    | EGFR     | 0        | 0      | 0   | 1      | Others   |
| NCTSGDLHILPVAFR_N2H6                   | N361_HexNAc(2)Hex(6)               | -0.089733346     | -0.881571903 | -0.546584611   | EGFR     | 1        | 0      | 0   | 0      | High_Man |
| NCTSGDLHILPVAFR_N2H7                   | N361_HexNAc(2)Hex(7)               | -0.303394753     | -0.524193275 | -0.857775485   | EGFR     | 1        | 0      | 0   | 0      | High_Man |
| NCTSGDLHILPVAFR_N2H8                   | N361_HexNAc(2)Hex(8)               | 0.029247539      | -0.310308457 | -0.148136411   | EGFR     | 1        | 0      | 0   | 0      | High_Man |
| NCTSGDLHILPVAFR_N4H4F1                 | N361_HexNAc(4)Hex(4)Fuc(1)         | 0.268611573      | -0.018577045 | 0.180085311    | EGFR     | 0        | 0      | 1   | 0      | Fucose   |
| NCTSGDLHILPVAFR_N4H5F1                 | N361_HexNAc(4)Hex(5)Fuc(1)         | 0.494577845      | 0.465247283  | 0.097712162    | EGFR     | 0        | 0      | 1   | 0      | Fucose   |
| NCTSGDLHILPVAFR_N4H6F1                 | N361_HexNAc(4)Hex(6)Fuc(1)         | 1.290284143      | 1.311640091  | 0.445364372    | EGFR     | 0        | 0      | 1   | 0      | Fucose   |
| NCTSGDLHILPVAFR_N4H7F1                 | N361_HexNAc(4)Hex(7)Fuc(1)         | 0.636479126      | 0.94183678   | 0.519462108    | EGFR     | 0        | 0      | 1   | 0      | Fucose   |
| LLIQAWPENR_N4H5F1                      | N413_HexNAc(4)Hex(5)Fuc(1)         | -0.02366056      | -1.031971808 | -0.605217375   | EGFR     | 0        | 0      | 1   | 0      | Fucose   |
| LLIQAWPENR_N4H5F2                      | N413_HexNAc(4)Hex(5)Fuc(2)         | 0.24825543       | -0.742616566 | -0.085881182   | EGFR     | 0        | 0      | 1   | 0      | Fucose   |
| TCPAGVMGNNNTLVWK_N2H12                 | N603_HexNAc(2)Hex(12)              | -0.126125358     | 0.163035408  | 1.21288094     | EGFR     | 1        | 0      | 0   | 0      | High_Man |
| TCPAGVMGNNNTLVWK_N2H8                  | N603_HexNAc(2)Hex(8)               | 0.81621641       | 0.90815393   | 0.2203077      | EGFR     | 1        | 0      | 0   | 0      | High_Man |
| TCPAGVMGNNNTLVWK_N4H5F1                | N603_HexNAc(4)Hex(5)Fuc(1)         | 0.671891766      | 0.032315783  | 0.527900002    | EGFR     | 0        | 0      | 1   | 0      | Fucose   |
| TCPAGVMGNNNTLVWK_N4H5F1S1              | N603_HexNAc(4)Hex(5)Fuc(1)NeuAs(1) | 0.670303892      | 1.275141235  | 2.606762278    | EGFR     | 0        | 1      | 1   | 0      | Static   |
| TCPAGVMGNNNTLVWK_N4H5F3                | N603_HexNAc(4)Hex(5)Fuc(3)         | 0.340046573      | 0.439915604  | 1.674639367    | EGFR     | 0        | 0      | 1   | 0      | Fucose   |
| TCPAGVMGNNNTLVWK_N6H7                  | N603_HexNAc(6)Hex(7)               | -0.043013751     | 0.355739112  | 1.569981046    | EGFR     | 0        | 0      | 0   | 1      | Others   |
| YADAGHVCHLCHPNCTYGTGPGLEGCTNGPK_N2H5   | N623_HexNAc(2)Hex(5)               | 0.509694414      | 0.22595487   | 0.283675536    | EGFR     | 1        | 0      | 0   | 0      | High_Man |
| YADAGHVCHLCHPNCTYGTGPGLEGCTNGPK_N2H6   | N623_HexNAc(2)Hex(6)               | 1.00998893       | 0.430777198  | -0.302030653   | EGFR     | 1        | 0      | 0   | 0      | High_Man |
| YADAGHVCHLCHPNCTYGTGPGLEGCTNGPK_N3H5F1 | N623_HexNAc(3)Hex(5)Fuc(1)         | 1.397379953      | 1.292584461  | 0.18147891     | EGFR     | 0        | 0      | 1   | 0      | Fucose   |
| YADAGHVCHLCHPNCTYGTGPGLEGCTNGPK_N4H4F1 | N623_HexNAc(4)Hex(4)Fuc(1)         | 0.708429231      | 0.297910351  | -0.425135388   | EGFR     | 0        | 0      | 1   | 0      | Fucose   |

Supplemental Table 3b

| Index                                    | Label                              | log <sub>2</sub> (LNCA-P-Fu8) | log <sub>2</sub> (PC3) | log <sub>2</sub> (LNCA-P-95) | RowLabel | High_Man | Sialic | Fuc | Others | GlyLabel |
|------------------------------------------|------------------------------------|-------------------------------|------------------------|------------------------------|----------|----------|--------|-----|--------|----------|
| DSISINATNIK_N2H10                        | N352_HexNAc(2)Hex(10)              | 2.291633                      | 1.74699                | 1.544199                     | EGFR     | 1        | 0      | 0   | 0      | High_Man |
| DSISINATNIK_N2H4                         | N352_HexNAc(2)Hex(4)               | 0.157339                      | 0.983109               | 1.191807                     | EGFR     | 1        | 0      | 0   | 0      | High_Man |
| DSISINATNIK_N2H6                         | N352_HexNAc(2)Hex(6)               | 0.986229                      | 0.387909               | 0.534889                     | EGFR     | 1        | 0      | 0   | 0      | High_Man |
| DSISINATNIK_N2H5F1                       | N352_HexNAc(2)Hex(5)Fuc(1)         | 0.347007                      | 0.106118               | 0.190494                     | EGFR     | 0        | 0      | 1   | 0      | Fucose   |
| DSISINATNIK_N2H8                         | N352_HexNAc(2)Hex(8)               | 0.981104                      | 0.834134               | 0.258932                     | EGFR     | 1        | 0      | 0   | 0      | High_Man |
| DSISINATNIK_N2H6F1                       | N352_HexNAc(2)Hex(6)Fuc(1)         | 2.033087                      | 2.271207               | 0.266873                     | EGFR     | 0        | 0      | 1   | 0      | Fucose   |
| DSISINATNIK_N2H7                         | N352_HexNAc(2)Hex(7)               | 2.97773                       | 2.8463                 | 0.687366                     | EGFR     | 1        | 0      | 0   | 0      | High_Man |
| DSISINATNIK_N2H7F1                       | N352_HexNAc(2)Hex(7)Fuc(1)         | 1.954272                      | 2.097151               | 0.257013                     | EGFR     | 0        | 0      | 1   | 0      | Fucose   |
| DSISINATNIK_N2H8                         | N352_HexNAc(2)Hex(8)               | 1.86822                       | 1.882519               | 0.545142                     | EGFR     | 1        | 0      | 0   | 0      | High_Man |
| DSISINATNIK_N2H9                         | N352_HexNAc(2)Hex(9)               | 1.77973                       | 1.811443               | 0.891006                     | EGFR     | 1        | 0      | 0   | 0      | High_Man |
| DSISINATNIK_N2H4F3                       | N352_HexNAc(4)Hex(4)Fuc(3)         | 0.598807                      | 0.611492               | 0.204886                     | EGFR     | 0        | 0      | 1   | 0      | Fucose   |
| DSISINATNIK_N4H4S1                       | N352_HexNAc(4)Hex(4)NeuAc(1)       | 1.174186                      | 1.277188               | -0.288086                    | EGFR     | 0        | 1      | 0   | 0      | Sialic   |
| DSISINATNIK_N4H4F1                       | N352_HexNAc(4)Hex(4)Fuc(1)         | 0.520727                      | 0.572158               | 0.542981                     | EGFR     | 0        | 0      | 1   | 0      | Fucose   |
| DSISINATNIK_N4H4F2                       | N352_HexNAc(4)Hex(4)Fuc(2)         | 1.493874                      | 1.720518               | 0.174441                     | EGFR     | 0        | 0      | 1   | 0      | Fucose   |
| NCT518GDLHLPVAFR_N2H8                    | N361_HexNAc(2)Hex(8)               | -0.08973                      | -0.88187               | -0.546582                    | EGFR     | 1        | 0      | 0   | 0      | High_Man |
| NCT518GDLHLPVAFR_N2H7                    | N361_HexNAc(2)Hex(7)               | 0.303386                      | -0.62418               | -0.867789                    | EGFR     | 1        | 0      | 0   | 0      | High_Man |
| NCT518GDLHLPVAFR_N2H6                    | N361_HexNAc(2)Hex(6)               | 0.026048                      | -0.3103                | -0.148146                    | EGFR     | 1        | 0      | 0   | 0      | High_Man |
| NCT518GDLHLPVAFR_N4H4F1                  | N361_HexNAc(4)Hex(4)Fuc(1)         | 0.288912                      | -0.01868               | 0.180085                     | EGFR     | 0        | 0      | 1   | 0      | Fucose   |
| NCT518GDLHLPVAFR_N4H5F1                  | N361_HexNAc(4)Hex(5)Fuc(1)         | 0.484578                      | 0.466247               | 0.097712                     | EGFR     | 0        | 0      | 1   | 0      | Fucose   |
| NCT518GDLHLPVAFR_N4H6F1                  | N361_HexNAc(4)Hex(6)Fuc(1)         | 1.290264                      | 1.31164                | 0.449364                     | EGFR     | 0        | 0      | 1   | 0      | Fucose   |
| NCT518GDLHLPVAFR_N4H7F1                  | N361_HexNAc(4)Hex(7)Fuc(1)         | 0.636479                      | 0.941837               | 0.519462                     | EGFR     | 0        | 0      | 1   | 0      | Fucose   |
| LLIQAWPENR_N4H5F1                        | N413_HexNAc(4)Hex(5)Fuc(1)         | -0.02366                      | -1.03197               | -0.60522                     | EGFR     | 0        | 0      | 1   | 0      | Fucose   |
| LLIQAWPENR_N4H5F2                        | N413_HexNAc(4)Hex(5)Fuc(2)         | 0.248255                      | -0.74262               | -0.08588                     | EGFR     | 0        | 0      | 1   | 0      | Fucose   |
| TCPAGVMGENTLVWK_N2H12                    | N603_HexNAc(2)Hex(12)              | -0.12613                      | 0.183036               | 1.212881                     | EGFR     | 1        | 0      | 0   | 0      | High_Man |
| TCPAGVMGENTLVWK_N2H8                     | N603_HexNAc(2)Hex(8)               | 0.818216                      | 0.908164               | 0.220308                     | EGFR     | 1        | 0      | 0   | 0      | High_Man |
| TCPAGVMGENTLVWK_N4H5F1                   | N603_HexNAc(4)Hex(5)Fuc(1)         | 0.671892                      | 0.032316               | 0.5279                       | EGFR     | 0        | 0      | 1   | 0      | Fucose   |
| TCPAGVMGENTLVWK_N4H5F1S1                 | N603_HexNAc(4)Hex(5)Fuc(1)NeuAc(1) | 0.670304                      | 1.275141               | 2.606762                     | EGFR     | 0        | 1      | 1   | 0      | Sialic   |
| TCPAGVMGENTLVWK_N4H5F3                   | N603_HexNAc(4)Hex(5)Fuc(3)         | 0.340047                      | 0.439916               | 1.674638                     | EGFR     | 0        | 0      | 1   | 0      | Fucose   |
| YADAGHVCHLCPNCTYOGTGP0LEOG PTNGPK_N2H6   | N623_HexNAc(3)Hex(6)Fuc(1)         | 0.609884                      | 0.226866               | 0.283878                     | EGFR     | 1        | 0      | 0   | 0      | High_Man |
| YADAGHVCHLCPNCTYOGTGP0LEOG PTNGPK_N2H8   | N623_HexNAc(3)Hex(8)Fuc(1)         | 1.009988                      | 0.430777               | -0.302038                    | EGFR     | 1        | 0      | 0   | 0      | High_Man |
| YADAGHVCHLCPNCTYOGTGP0LEOG PTNGPK_N4H5F1 | N623_HexNAc(4)Hex(5)Fuc(1)         | 1.39738                       | 1.292584               | 0.181479                     | EGFR     | 0        | 0      | 1   | 0      | Fucose   |
| YADAGHVCHLCPNCTYOGTGP0LEOG PTNGPK_N4H4F1 | N623_HexNAc(4)Hex(4)Fuc(1)         | 0.708429                      | 0.29791                | -0.42514                     | EGFR     | 0        | 0      | 1   | 0      | Fucose   |

Supplemental Table 3c

| Index                                    | Label                              | log <sub>2</sub> (LNCA-P-Fu8) | log <sub>2</sub> (PC3) | log <sub>2</sub> (LNCA-P-95) | RowLabel | High_Man | Sialic | Fuc | Others | GlyLabel |
|------------------------------------------|------------------------------------|-------------------------------|------------------------|------------------------------|----------|----------|--------|-----|--------|----------|
| DSISINATNIK_N2H5F1                       | N352_HexNAc(2)Hex(5)Fuc(1)         | 0.347007                      | 0.106118               | 0.190494                     | EGFR     | 0        | 0      | 1   | 0      | Fucose   |
| DSISINATNIK_N2H6F1                       | N352_HexNAc(2)Hex(6)Fuc(1)         | 2.033087                      | 2.271207               | 0.266873                     | EGFR     | 0        | 0      | 1   | 0      | Fucose   |
| DSISINATNIK_N2H7F1                       | N352_HexNAc(2)Hex(7)Fuc(1)         | 1.954272                      | 2.097151               | 0.257013                     | EGFR     | 0        | 0      | 1   | 0      | Fucose   |
| DSISINATNIK_N4H4F1                       | N352_HexNAc(4)Hex(4)Fuc(1)         | 0.520727                      | 0.572158               | 0.542981                     | EGFR     | 0        | 0      | 1   | 0      | Fucose   |
| DSISINATNIK_N4H4F2                       | N352_HexNAc(4)Hex(4)Fuc(2)         | 1.493874                      | 1.720518               | 0.174441                     | EGFR     | 0        | 0      | 1   | 0      | Fucose   |
| NCT518GDLHLPVAFR_N4H4F1                  | N361_HexNAc(4)Hex(4)Fuc(1)         | 0.288912                      | -0.01868               | 0.180085                     | EGFR     | 0        | 0      | 1   | 0      | Fucose   |
| NCT518GDLHLPVAFR_N4H5F1                  | N361_HexNAc(4)Hex(5)Fuc(1)         | 0.484578                      | 0.466247               | 0.097712                     | EGFR     | 0        | 0      | 1   | 0      | Fucose   |
| NCT518GDLHLPVAFR_N4H6F1                  | N361_HexNAc(4)Hex(6)Fuc(1)         | 1.290264                      | 1.31164                | 0.449364                     | EGFR     | 0        | 0      | 1   | 0      | Fucose   |
| NCT518GDLHLPVAFR_N4H7F1                  | N361_HexNAc(4)Hex(7)Fuc(1)         | 0.636479                      | 0.941837               | 0.519462                     | EGFR     | 0        | 0      | 1   | 0      | Fucose   |
| LLIQAWPENR_N4H5F1                        | N413_HexNAc(4)Hex(5)Fuc(1)         | -0.02366                      | -1.03197               | -0.60522                     | EGFR     | 0        | 0      | 1   | 0      | Fucose   |
| LLIQAWPENR_N4H5F2                        | N413_HexNAc(4)Hex(5)Fuc(2)         | 0.248255                      | -0.74262               | -0.08588                     | EGFR     | 0        | 0      | 1   | 0      | Fucose   |
| TCPAGVMGENTLVWK_N4H5F1                   | N603_HexNAc(4)Hex(5)Fuc(1)         | 0.671892                      | 0.032316               | 0.5279                       | EGFR     | 0        | 0      | 1   | 0      | Fucose   |
| TCPAGVMGENTLVWK_N4H5F1S1                 | N603_HexNAc(4)Hex(5)Fuc(1)NeuAc(1) | 0.670304                      | 1.275141               | 2.606762                     | EGFR     | 0        | 1      | 1   | 0      | Sialic   |
| TCPAGVMGENTLVWK_N4H5F3                   | N603_HexNAc(4)Hex(5)Fuc(3)         | 0.340047                      | 0.439916               | 1.674638                     | EGFR     | 0        | 0      | 1   | 0      | Fucose   |
| YADAGHVCHLCPNCTYOGTGP0LEOG PTNGPK_N3H5F1 | N623_HexNAc(3)Hex(5)Fuc(1)         | 1.39738                       | 1.292584               | 0.181479                     | EGFR     | 0        | 0      | 1   | 0      | Fucose   |
| YADAGHVCHLCPNCTYOGTGP0LEOG PTNGPK_N4H4F1 | N623_HexNAc(4)Hex(4)Fuc(1)         | 0.708429                      | 0.29791                | -0.42514                     | EGFR     | 0        | 0      | 1   | 0      | Fucose   |

**Supplemental Table 4a**

| UniProt | Gene Symbol | Protein Name                                         |
|---------|-------------|------------------------------------------------------|
| Q15054  | POLD3       | POLD3; DNA polymerase delta 3, accessory subunit     |
| P39748  | FEN1        | FEN1; flap structure-specific endonuclease 1         |
| P18858  | LIG1        | LIG1; DNA ligase 1                                   |
| P49736  | MCM2        | MCM2; minichromosome maintenance complex component 2 |
| P25205  | MCM3        | MCM3; minichromosome maintenance complex component 3 |
| P33991  | MCM4        | MCM4; minichromosome maintenance complex component 4 |
| P33992  | MCM5        | MCM5; minichromosome maintenance complex component 5 |
| Q14566  | MCM6        | MCM6; minichromosome maintenance complex component 6 |
| P33993  | MCM7        | MCM7; minichromosome maintenance complex component 7 |
| P12004  | PCNA        | PCNA; proliferating cell nuclear antigen             |
| Q9NRF9  | POLE3       | 7 POLE3; DNA polymerase epsilon 3, accessory subunit |
| P09884  | POLA1       | POLA1; DNA polymerase alpha 1, catalytic subunit     |
| P49005  | POLD2       | POLD2; DNA polymerase delta 2, accessory subunit     |
| P49642  | PRIM1       | PRIM1; DNA primase subunit 1                         |
| P49643  | PRIM2       | PRIM2; DNA primase subunit 2                         |
| Q9NR33  | POLE4       | 5 POLE4; DNA polymerase epsilon 4, accessory subunit |
| P35251  | RFC1        | RFC1; replication factor C subunit 1                 |
| P35250  | RFC2        | RFC2; replication factor C subunit 2                 |
| P40938  | RFC3        | RFC3; replication factor C subunit 3                 |
| P35249  | RFC4        | RFC4; replication factor C subunit 4                 |
| P40937  | RFC5        | RFC5; replication factor C subunit 5                 |

**Supplemental Table 4b**

| UniProt | Gene Symbol | Protein Name                                             |
|---------|-------------|----------------------------------------------------------|
| P24941  | CDK2        | cyclin dependent kinase 2                                |
| Q9UM13  | ANAPC10     | anaphase promoting complex subunit 10                    |
| O14757  | CHEK1       | checkpoint kinase 1                                      |
| Q9Y5N6  | ORC6        | origin recognition complex subunit 6                     |
| Q13257  | MAD2L1      | mitotic arrest deficient 2 like 1                        |
| P49736  | MCM2        | minichromosome maintenance complex component 2           |
| P25205  | MCM3        | minichromosome maintenance complex component 3           |
| P33991  | MCM4        | minichromosome maintenance complex component 4           |
| P33992  | MCM5        | minichromosome maintenance complex component 5           |
| Q14566  | MCM6        | minichromosome maintenance complex component 6           |
| P33993  | MCM7        | minichromosome maintenance complex component 7           |
| P12004  | PCNA        | proliferating cell nuclear antigen                       |
| P53350  | PLK1        | polo like kinase 1                                       |
| Q13535  | ATR         | ATR serine/threonine kinase                              |
| P06400  | RB1         | RB transcriptional corepressor 1                         |
| P24385  | CCND1       | cyclin D1                                                |
| O60566  | BUB1B       | BUB1 mitotic checkpoint serine/threonine kinase B        |
| P33981  | TTK         | TTK protein kinase                                       |
| O00311  | CDC7        | cell division cycle 7                                    |
| P20248  | CCNA2       | cyclin A2                                                |
| P14635  | CCNB1       | cyclin B1                                                |
| Q99640  | PKMYT1      | protein kinase, membrane associated tyrosine/threonine 1 |
| O95067  | CCNB2       | cyclin B2                                                |
| O95997  | PTTG1       | PTTG1 regulator of sister chromatid separation, securin  |
| P06493  | CDK1        | cyclin dependent kinase 1                                |
| Q12834  | CDC20       | cell division cycle 20                                   |
| P30307  | CDC25C      | cell division cycle 25C                                  |
| P30260  | CDC27       | cell division cycle 27                                   |
